# Supplementary material
Source: Springer Nature journal article supplement (https://www.springermedizin.de/resource/supplementary/12958_2010_688_MOESM6_ESM.pdf/9568590)

IL11 (ng/ml)

**A**

cont 1 10 100 500

ECC-1

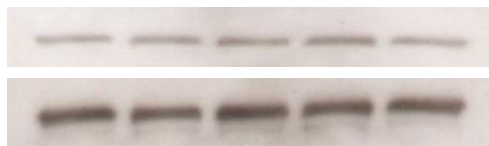

pSTAT3

STAT3

**B**

cont 1 10 100 500

HEC-1A

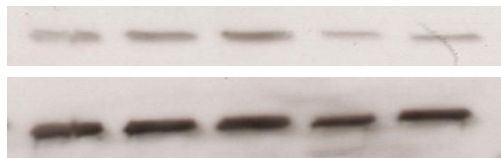

pSTAT3

STAT3

**C**

cont 1 10 100 500

Ishikawa

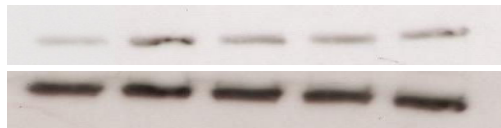

pSTAT3

STAT3

Supplement: MOESM6 [file 9568590]
